# Supplementary material
Source: Research Square preprint supplement (doi:10.21203/rs.3.rs-8689461/v1)
Supplement: Supplementary file 2 [file fefbc1059b6a7b2743eb14f4.xlsx]

## Sheet: Organism by Sick-cell
	Pathogens/Etiology	Overall	95% CI	Non SCD	95% CI	Sickle Cell disease	95% CI	Sickle Cell trait	95% CI
		N = 499		N = 405		N = 28		N = 66
Parasite	Plasmodium falciparum, n (%)	168 (33.7%)	29.6%, 38.0%	145 (35.8%)	31.2%, 40.7%	11 (39.3%)	22.1%, 59.3%	12 (18.2%)	10.1%, 30.0%
	Ascaris lumbricoides, n (%)	2 (0.4%)	0.07%, 1.60%	2 (0.5%)	0.09%, 1.97%	0 (0.0%)	0%, 15.0%	0 (0.0%)	0%, 6.85%
	Plasmodium malariae, n (%)	1 (0.2%)	0.01%, 1.29%	1 (0.2%)	0.01%, 1.59%	0 (0.0%)	0%, 15.0%	0 (0.0%)	0%, 6.85%
Bacteria	Klebsiella pneumoniae, n (%)	130 (26.1%)	22.3%, 30.2%	103 (25.4%)	21.3%, 30.0%	2 (7.1%)	1.25%, 25.0%	25 (37.9%)	26.5%, 50.7%
	Streptococcus pneumoniae, n (%)	61 (12.2%)	9.55%, 15.5%	49 (12.1%)	9.17%, 15.8%	6 (21.4%)	9.03%, 41.5%	6 (9.1%)	3.75%, 19.4%
	Escherichia coli, n (%)	56 (11.2%)	8.66%, 14.4%	50 (12.3%)	9.38%, 16.0%	1 (3.6%)	0.19%, 20.2%	5 (7.6%)	2.82%, 17.5%
	Staphylococcus aureus, n (%)	30 (6.0%)	4.16%, 8.57%	26 (6.4%)	4.32%, 9.38%	1 (3.6%)	0.19%, 20.2%	3 (4.5%)	1.18%, 13.6%
	Streptococcus spp., n (%)	17 (3.4%)	2.06%, 5.51%	16 (4.0%)	2.35%, 6.47%	0 (0.0%)	0%, 15.0%	1 (1.5%)	0.08%, 9.27%
	Haemophilus influenzae, n (%)	16 (3.2%)	1.91%, 5.27%	13 (3.2%)	1.79%, 5.57%	1 (3.6%)	0.19%, 20.2%	2 (3.0%)	0.53%, 11.5%
	Pseudomonas aeruginosa, n (%)	11 (2.2%)	1.16%, 4.03%	10 (2.5%)	1.26%, 4.64%	0 (0.0%)	0%, 15.0%	1 (1.5%)	0.08%, 9.27%
	Streptococcus pyogenes, n (%)	11 (2.2%)	1.16%, 4.03%	9 (2.2%)	1.09%, 4.33%	1 (3.6%)	0.19%, 20.2%	1 (1.5%)	0.08%, 9.27%
	Acinetobacter baumannii, n (%)	8 (1.6%)	0.75%, 3.26%	5 (1.2%)	0.46%, 3.03%	0 (0.0%)	0%, 15.0%	3 (4.5%)	1.18%, 13.6%
	Streptococcus agalactiae, n (%)	8 (1.6%)	0.75%, 3.26%	7 (1.7%)	0.76%, 3.69%	0 (0.0%)	0%, 15.0%	1 (1.5%)	0.08%, 9.27%
	Aeromonas spp., n (%)	5 (1.0%)	0.37%, 2.46%	5 (1.2%)	0.46%, 3.03%	0 (0.0%)	0%, 15.0%	0 (0.0%)	0%, 6.85%
	Enterobacter cloacae, n (%)	5 (1.0%)	0.37%, 2.46%	4 (1.0%)	0.32%, 2.69%	0 (0.0%)	0%, 15.0%	1 (1.5%)	0.08%, 9.27%
	Salmonella spp., n (%)	5 (1.0%)	0.37%, 2.46%	4 (1.0%)	0.32%, 2.69%	1 (3.6%)	0.19%, 20.2%	0 (0.0%)	0%, 6.85%
	Escherichia coli/shigella spp., n (%)	4 (0.8%)	0.26%, 2.18%	4 (1.0%)	0.32%, 2.69%	0 (0.0%)	0%, 15.0%	0 (0.0%)	0%, 6.85%
	Citrobacter freundi, n (%)	3 (0.6%)	0.16%, 1.90%	3 (0.7%)	0.19%, 2.33%	0 (0.0%)	0%, 15.0%	0 (0.0%)	0%, 6.85%
	Klebsiella spp., n (%)	3 (0.6%)	0.16%, 1.90%	2 (0.5%)	0.09%, 1.97%	1 (3.6%)	0.19%, 20.2%	0 (0.0%)	0%, 6.85%
Virus	HIV, n (%)	43 (8.6%)	6.37%, 11.5%	35 (8.6%)	6.17%, 11.9%	1 (3.6%)	0.19%, 20.2%	7 (10.6%)	4.73%, 21.2%
	Cytomegalovirus (cmv), n (%)	37 (7.4%)	5.34%, 10.2%	30 (7.4%)	5.13%, 10.5%	0 (0.0%)	0%, 15.0%	7 (10.6%)	4.73%, 21.2%
	Adenovirus, n (%)	18 (3.6%)	2.22%, 5.75%	15 (3.7%)	2.16%, 6.17%	0 (0.0%)	0%, 15.0%	3 (4.5%)	1.18%, 13.6%
	Respiratory syncytial virus (rsv), n (%)	9 (1.8%)	0.88%, 3.52%	6 (1.5%)	0.60%, 3.36%	1 (3.6%)	0.19%, 20.2%	2 (3.0%)	0.53%, 11.5%
	Rotavirus a, n (%)	6 (1.2%)	0.49%, 2.73%	4 (1.0%)	0.32%, 2.69%	0 (0.0%)	0%, 15.0%	2 (3.0%)	0.53%, 11.5%
	Rotavirus non-typable, n (%)	6 (1.2%)	0.49%, 2.73%	5 (1.2%)	0.46%, 3.03%	0 (0.0%)	0%, 15.0%	1 (1.5%)	0.08%, 9.27%
	Human metapneumovirus (hmpv), n (%)	3 (0.6%)	0.16%, 1.90%	1 (0.2%)	0.01%, 1.59%	0 (0.0%)	0%, 15.0%	2 (3.0%)	0.53%, 11.5%
	Norovirus gii, n (%)	3 (0.6%)	0.16%, 1.90%	3 (0.7%)	0.19%, 2.33%	0 (0.0%)	0%, 15.0%	0 (0.0%)	0%, 6.85%
	Influenza a, n (%)	2 (0.4%)	0.07%, 1.60%	0 (0.0%)	0%, 1.17%	2 (7.1%)	1.25%, 25.0%	0 (0.0%)	0%, 6.85%
	Influenza b, n (%)	2 (0.4%)	0.07%, 1.60%	1 (0.2%)	0.01%, 1.59%	0 (0.0%)	0%, 15.0%	1 (1.5%)	0.08%, 9.27%
	Norovirus gi, n (%)	2 (0.4%)	0.07%, 1.60%	0 (0.0%)	0%, 1.17%	0 (0.0%)	0%, 15.0%	2 (3.0%)	0.53%, 11.5%
	Parainfluenza virus type 1, n (%)	2 (0.4%)	0.07%, 1.60%	2 (0.5%)	0.09%, 1.97%	0 (0.0%)	0%, 15.0%	0 (0.0%)	0%, 6.85%
	Parainfluenza virus type 3, n (%)	2 (0.4%)	0.07%, 1.60%	1 (0.2%)	0.01%, 1.59%	0 (0.0%)	0%, 15.0%	1 (1.5%)	0.08%, 9.27%
	Parvovirus b19, n (%)	2 (0.4%)	0.07%, 1.60%	1 (0.2%)	0.01%, 1.59%	1 (3.6%)	0.19%, 20.2%	0 (0.0%)	0%, 6.85%
Fungi	Pneumocystis jirovecii, n (%)	6 (1.2%)	0.49%, 2.73%	6 (1.5%)	0.60%, 3.36%	0 (0.0%)	0%, 15.0%	0 (0.0%)	0%, 6.85%
	Candida albicans, n (%)	1 (0.2%)	0.01%, 1.29%	1 (0.2%)	0.01%, 1.59%	0 (0.0%)	0%, 15.0%	0 (0.0%)	0%, 6.85%
	Yeast, n (%)	1 (0.2%)	0.01%, 1.29%	1 (0.2%)	0.01%, 1.59%	0 (0.0%)	0%, 15.0%	0 (0.0%)	0%, 6.85%
	Yeast fungaemia, n (%)	1 (0.2%)	0.01%, 1.29%	1 (0.2%)	0.01%, 1.59%	0 (0.0%)	0%, 15.0%	0 (0.0%)	0%, 6.85%
1 NA
Abbreviation: CI = Confidence Interval
